# Supplementary material for: Effect of Neoadjuvant Chemotherapy on Tumor-Infiltrating Lymphocytes in Resectable Gastric Cancer: Analysis from a Western Academic Center
Source: MDPI journal article supplement (doi:10.3390/cancers16071428), 2024-04-07
Supplement: s1 [file s1]

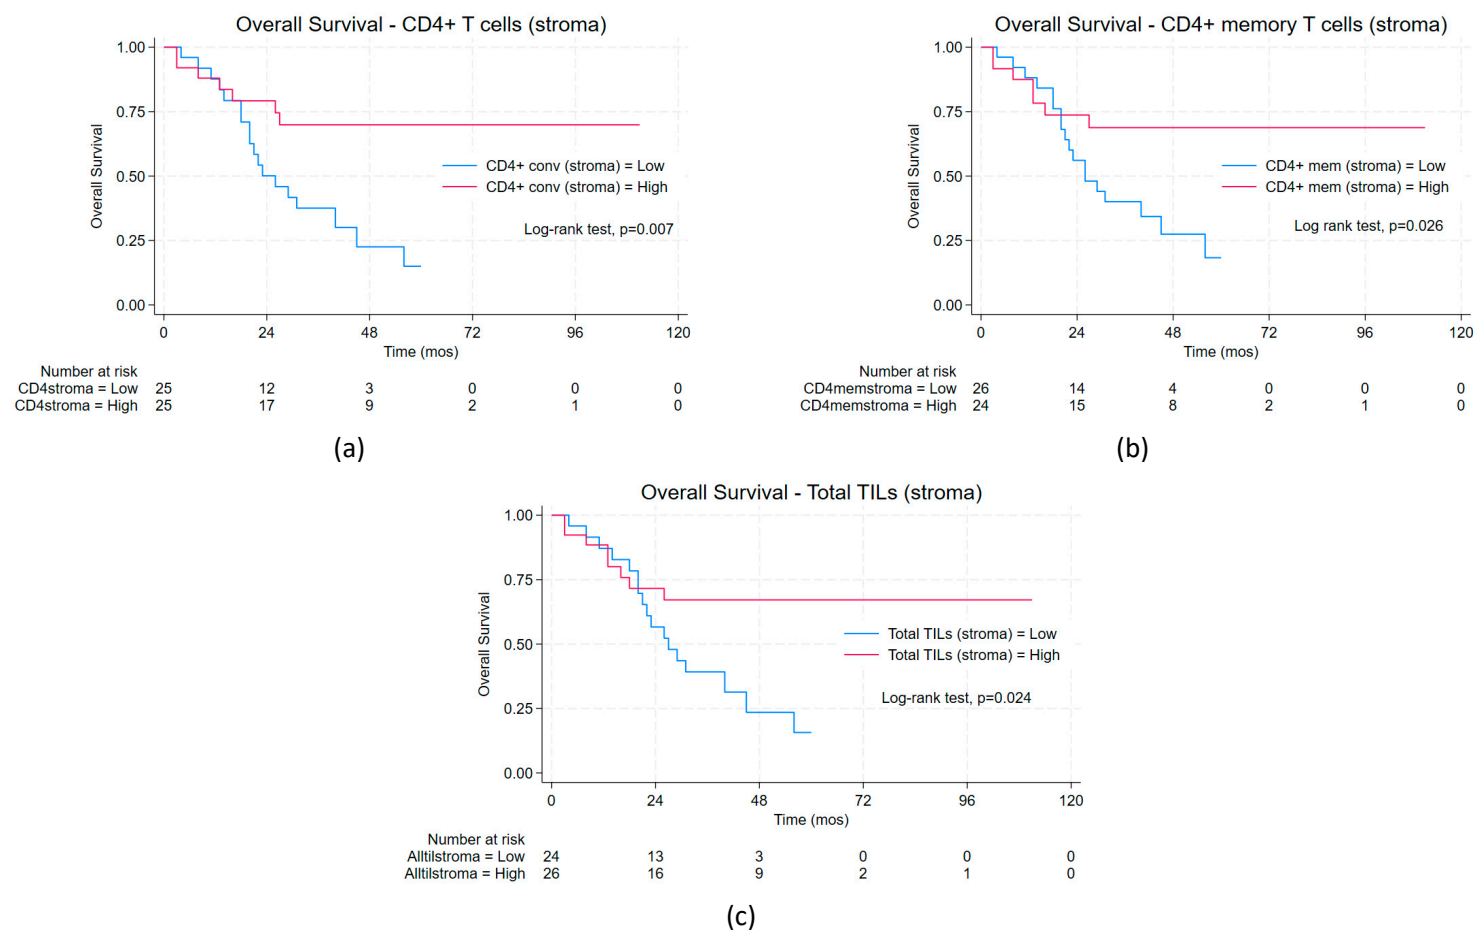

**Supplemental Figure S1a-c.** Kaplan-Meier survival curves with log-rank analyses demonstrating improved overall survival with high compared to low **stromal** TILs in all patients who received neoadjuvant chemotherapy. Median survival follows in parentheses. (a) low (26.0 mos) versus high (NR, not reached) CD4+ conventional (conv) T cells;  $p=0.007$  (b) low (26.0 mos) versus high (NR) CD4+ memory (mem) T cells;  $p=0.026$  (c) low (27.0 mos) versus high (NR) total TILs;  $p=0.024$ .

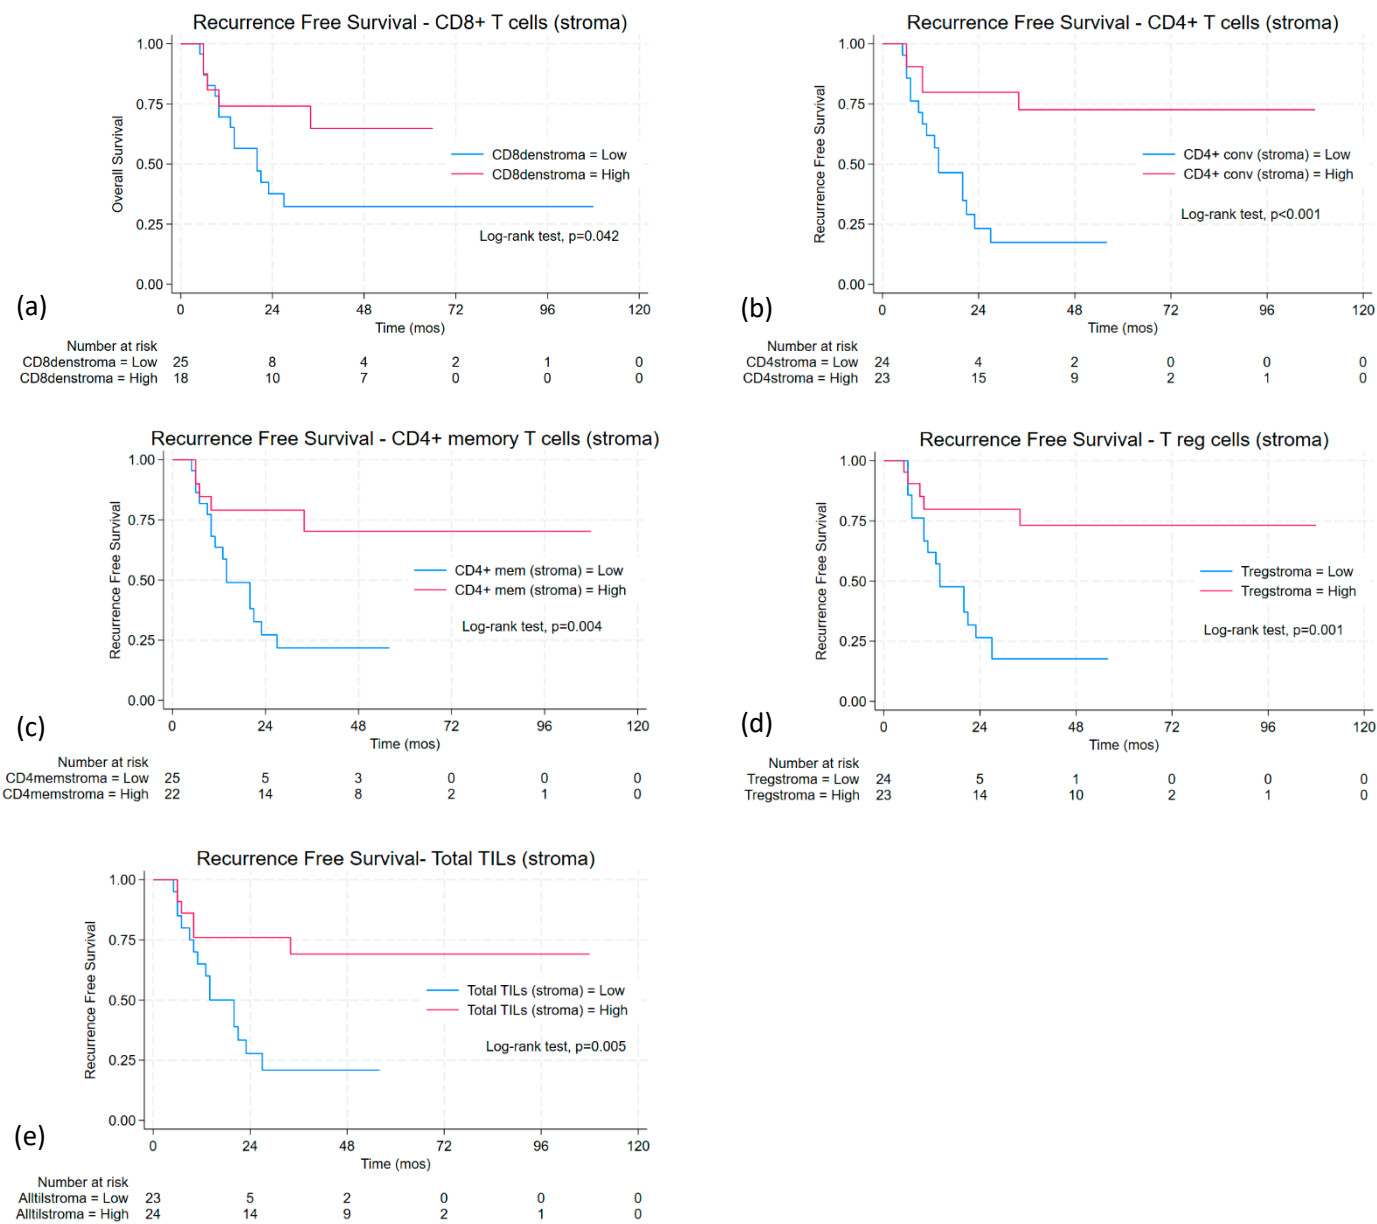

**Supplemental Figure S2a-e.** Kaplan-Meier survival curves with log-rank analyses demonstrating improved recurrence free survival in all patients who received neoadjuvant chemotherapy with high compared to low **stromal** TILs. Median survival follows in parentheses. (a) low (20.0 mos) versus high (NR, not reached) CD8+ conventional (conv) T cells;  $p=0.042$  (b) low (14.0 mos) versus high (NR) CD4+ T cells;  $p<0.001$  (c) low (14.0 mos) versus high (NR) CD4+ memory (mem) T cells;  $p=0.004$  (d) low (14.0 mos) versus high (NR) Tregulatory (Treg) cells;  $p=0.001$  (e) low (14.0 mos) versus high (NR) total TILs;  $p=0.005$ .

**Supplemental Table S1.** Multivariable Cox regression survival analysis for overall survival.

| Variable                   | Univariable           |              | Multivariable          |              |
|----------------------------|-----------------------|--------------|------------------------|--------------|
|                            | HR (95% CI)           | p            | HR (95% CI)            | p            |
| ECOG                       |                       |              |                        |              |
| 0 (ref) v 1                | 1.75 (0.865-3.567)    | 0.119        | 3.079 (1.146-8.271)    | <b>0.026</b> |
| 0 v 2                      | 0.550 (0.072-4.224)   | 0.566        | 4.248 (0.351-51.484)   | 0.256        |
| Sex                        |                       | 0.891        |                        |              |
| Male (ref) v Female        | 1.059 (0.467-2.401)   |              |                        |              |
| Clinical T stage           |                       |              |                        |              |
| T1 (ref) v T2              | 0.703 (0.062-7.942)   | 0.776        |                        |              |
| T1 v T3                    | 1.141 (0.150-8.704)   | 0.899        |                        |              |
| T1 v T4                    | 1.524 (0.177-13.095)  | 0.701        |                        |              |
| Clinical nodal stage       |                       |              |                        |              |
| N0 (ref) v N1              | 0.673 (0.283-1.6)     | 0.370        |                        |              |
| N0 vs N2-3                 | 0.859 (0.242-3.053)   | 0.815        |                        |              |
| Clinical overall stage     |                       |              |                        |              |
| Stage I (ref) v stage II   | 2.661 (0.343-20.636)  | 0.349        |                        |              |
| Stage I v stage III        | 1.948 (0.251-15.107)  | 0.523        |                        |              |
| Stage I v stage IVa        | 0.5882 (0.360-96.173) | 0.314        |                        |              |
| NAC regimen                |                       |              |                        |              |
| FOLFOX (ref) v FLOT        | 1.405 (0.395-4.999)   | 0.600        |                        |              |
| FOLFOX v ECF               | 0.920 (0.119-7.093)   | 0.936        |                        |              |
| FOLFOX v EOX               | 1.628 (0.528-4.019)   | 0.396        |                        |              |
| FOLFOX v DCF               | 1.159 (0.330-4.074)   | 0.818        |                        |              |
| FOLFOX v ECX               | 0                     | 0.986        |                        |              |
| FOLFOX v other doublet     | 0.507 (0.066-3.910)   | 0.514        |                        |              |
| Lymphovascular invasion    |                       |              |                        |              |
| No (ref) v Yes             | 2.49 (1.017-6.105)    | <b>0.046</b> | 2.383 (0.831-6.831)    | 0.106        |
| Perineural invasion        |                       |              |                        |              |
| No (ref) v Yes             | 2.531 (0.964-6.646)   | 0.059        |                        |              |
| Histologic subtype         |                       |              |                        |              |
| Intestinal (ref) v Diffuse | 3.282 (1.113-9.681)   | <b>0.031</b> | 4.094 (1.128-14.854)   | <b>0.032</b> |
| Intestinal vs mixed        | 7.727 (1.322-45.175)  | <b>0.023</b> | 36.794 (3.694-366.460) | <b>0.002</b> |
| Intestinal v neuorendo fx  | 0                     | 0.984        | 0                      |              |
| Tumor location             |                       |              |                        |              |
| Distal (ref) v proximal    | 1.786 (0.751-4.248)   | 0.189        |                        |              |
| Distal v linitus plastica  | 2.960 (0.952-9.202)   | 0.061        |                        |              |
| CD4+ conv T cells (stroma) |                       |              |                        |              |
| Low (ref) v High           | 0.317 (0.131-0.766)   | <b>0.011</b> | 0.591 (0.216-1.615)    | 0.306        |
| PD-L1 status               |                       |              |                        |              |
| Negative (ref) v positive  | 1.463 (0.667-3.210)   | 0.343        |                        |              |

**Supplemental Table S2.** Univariable and multivariable Cox regression analysis for recurrence free survival.

| Variable                     | Univariable          |              | Multivariable          |       |
|------------------------------|----------------------|--------------|------------------------|-------|
|                              | HR (95% CI)          | p            | HR (95% CI)            | p     |
| ECOG                         |                      |              |                        |       |
| 0 (ref) v 1                  | 1.927 (0.754-4.928)  | 0.171        | 2.121 (0.226-7.056)    | 0.214 |
| 0 v 2                        | 3.659 (0.776-17.255) | 0.101        | 12.763 (0.732-222.674) | 0.081 |
| Sex                          |                      |              |                        |       |
| Male (ref) v Female          | 1.661 (0.703-3.920)  | 0.247        |                        |       |
| Clinical T stage             |                      |              |                        |       |
| T1 (ref) v T2                | 0.821 (0.073-9.201)  | 0.873        |                        |       |
| T1 v T3                      | 1.068 (0.139-8.198)  | 0.949        |                        |       |
| T1 v T4                      | 2.080 (0.231-18.704) | 0.513        |                        |       |
| Clinical Nodal stage         |                      |              |                        |       |
| N0 (ref) v N1                | 1.485 (0.575-3.833)  | 0.414        |                        |       |
| N0 vs N2-3                   | 2.631 (0.678-10.206) | 0.162        |                        |       |
| Clinical overall stage       |                      |              |                        |       |
| Stage I (ref) v stage II     | 2.007 (0.246-16.348) | 0.515        |                        |       |
| Stage I v stage III          | 2.931 (0.383-22.432) | 0.300        |                        |       |
| NAC regimen                  |                      |              |                        |       |
| FOLFOX (ref) v FLOT          | 0.966 (0.211-4.432)  | 0.964        |                        |       |
| FOLFOX v ECF                 | 2.318 (0.503-10.673) | 0.281        |                        |       |
| FOLFOX v EOX                 | 2.718 (0.843-8.767)  | 0.094        |                        |       |
| FOLFOX v DCF                 | 0.627 (0.080-4.909)  | 0.657        |                        |       |
| FOLFOX v ECX                 | 0                    | 0.987        |                        |       |
| FOLFOX v other doublet       | 1.762 (0.383-8.110)  | 0.467        |                        |       |
| Lymphovascular invasion      |                      | <b>0.005</b> |                        |       |
| No (ref) v Yes               | 4.247 (1.537-11.731) |              | 2.989 (0.504-17.716)   | 0.228 |
| Perineural invasion          |                      | <b>0.021</b> |                        |       |
| No (ref) v Yes               | 3.756 (1.225-11.519) |              | 2.401 (0.391-14.754)   | 0.344 |
| Histologic subtype           |                      |              |                        |       |
| Intestinal (ref) v Diffuse   | 3.994 (1.157-13.786) | <b>0.028</b> | 2.444 (0.462-12.927)   | 0.293 |
| Intestinal vs mixed          | 3.183 (0.319-31.797) | 0.324        | 6.291 (0.329-120.136)  | 0.222 |
| Intestinal v neuroendo fx    | 5.337 (0.543-52.419) | 0.151        | 0.531 (0.017-16.190)   | 0.717 |
| Tumor location               |                      |              |                        |       |
| Distal (ref) v proximal      | 1.221 (0.458-3.257)  | 0.690        |                        |       |
| Distal v linitus plastica    | 2.682 (0.725-9.926)  | 0.139        |                        |       |
| PD-L1 status                 |                      |              |                        |       |
| Negative (ref) v positive    | 1.141 (0.480-2.714)  | 0.766        |                        |       |
|                              |                      |              |                        |       |
| CD8+ memory T cells (stroma) | 0.211 (0.070-0.633)  | 0.006        | 0.408 (0.079-2.119)    | 0.286 |
| CD4+ T cells (stroma)        | 0.206 (0.073-0.576)  | 0.003        | 0.411 (0.063-2.668)    | 0.351 |
| CD4+ memory T cells (stroma) | 0.258 (0.093-0.714)  | 0.009        | 0.486 (0.106-2.238)    | 0.355 |
| Treg (stroma)                | 0.211 (0.073-0.607)  | 0.004        | 0.702 (0.173-2.842)    | 0.620 |
| Total TiLs (stroma)          | 0.277 (0.105-0.730)  | 0.009        | 1.264 (0.226-7.056)    | 0.790 |
